# Supplementary material for: Insight into the molecular mechanisms of leaf coloration in Cymbidium ensifolium
Source: Front Genet. 2022 Aug 12;13:923082. doi: 10.3389/fgene.2022.923082 (PMC9413228; doi:10.3389/fgene.2022.923082)
Supplement: Supplementary file 10 [file Table1.XLSX]

## Sheet: Sheet1
	Table S1. Differentially expressed Anthocyanins in three comparisons																		Green leaf			Purple leaf			Yellow leaf
	L (Green leaves) vs. H (Yellow leaves)																Index	Compounds	L-1	L-2	L-3	Z-1	Z-2	Z-3	H-1	H-2	H-3	mean (H)	mean (L)	mean (Z)
#	Index	Compounds	Class	L-1	L-2	L-3	H-1	H-2	H-3	Pvalue	Fold_Change	Log2FC	Type			1	Cya-3-O-glu	Cyanidin-3-O-glucoside	0.0406	0.00477	0.00304	58.3	62	45.1	45.3	46.8	41.7	44.6	0.0161	55.1333
1	Del-3-O-glu	Delphinidin-3-O-glucoside	Delphinidin	0.587	0.143	0.196	0.953	0.686	0.435	0.135467	2.2397	1.1633	up			2	Cya-3-O-sop	Cyanidin-3-O-sophoroside	0.0147	0.00507	0.00612	0.025	0.0307	0.0185	0.0183	0.018	0.0142	0.0168	0.0086	0.0247
2	Cya-3-O-glu	Cyanidin-3-O-glucoside	Cyanidin	0.0406	0.00477	0.00304	45.3	46.8	41.7	0.00114934	2763.89	11.4325	up			3	Del-3-O-glu	Delphinidin-3-O-glucoside	0.587	0.143	0.196	0.543	0.94	0.612	0.953	0.686	0.435	0.6913	0.3087	0.6983
3	Cya-3-O-(6-O-malonyl)-glu	Cyanidin-3-O-(6-O-malonyl-beta-D-glucoside)	Cyanidin	0.144	0.0343	0.036	222	236	195	0.00304358	3047.13	11.5732	up			4	Fla_dihydromyricetin	Dihydromyricetin	5.87	1.84	1.37	0.252	0.297	0.226	0.514	0.391	0.525	0.4767	3.0267	0.2583
4	Cya-3-O-xyl	Cyanidin-3-O-xyloside	Cyanidin	0.00967	0.00974	0.00694	0.0514	0.0674	0.0472	0.015386	6.2998	2.6553	up			5	Fla_quercetin-glu	Quercetin-3-O-glucoside	83.2	16.3	18.7	89.4	104	69.1	136	82.9	63.5	94.1333	39.4	87.5
5	Pet-3-O-gal	Petunidin-3-O-galactoside	Petunidin	0.896	0.443	0.451	0.111	0.101	0.101	0.0812464	0.1749	-2.5154	down			6	Peo-3-O-gal	Peonidin-3-O-galactoside	0.201	0.133	0.166	0.664	0.887	0.598	0.683	0.759	0.645	0.6957	0.1667	0.7163
6	Pet-3-O-glu	Petunidin-3-O-glucoside	Petunidin	3.7	1.21	1.33	0.927	0.732	0.586	0.241016	0.3598	-1.4747	down			7	Peo-3-O-sop	Peonidin-3-O-sophoroside	0.106	0.0698	0.0815	0.085	0.114	0.0839	0.148	0.125	0.0979	0.1236	0.0858	0.0943
7	Pet-3-O-(6-O-malonyl)-glu	Petunidin-3-O-(6-O-malonyl-beta-D-glucoside)	Petunidin	0.527	0.241	0.237	1.64	1.13	0.767	0.0648521	3.5194	1.8153	up			8	Pet-3-O-(6-O-malonyl)-glu	Petunidin-3-O-(6-O-malonyl-beta-D-glucoside)	0.527	0.241	0.237	0.959	0.329	0.243	1.64	1.13	0.767	1.179	0.335	0.5103
8	Pel-3-O-(6-O-malonyl)-glu	Pelargonidin-3-O-(6-O-malonyl-beta-D-glucoside)	Pelargonidin	0.0533	0.0515	0.0517	3.95	4.62	4.23	0.0021181	81.7891	6.3538	up			9	Pet-3-O-glu	Petunidin-3-O-glucoside	3.7	1.21	1.33	0.46	0.679	0.378	0.927	0.732	0.586	0.7483	2.08	0.5057
9	Peo-3-O-gal	Peonidin-3-O-galactoside	Peonidin	0.201	0.133	0.166	0.683	0.759	0.645	0.000581775	4.174	2.0614	up			10	Cya-3-O-(6-O-malonyl)-glu	Cyanidin-3-O-(6-O-malonyl-beta-D-glucoside)	0.144	0.0343	0.036	446	447	352	222	236	195	217.667	0.0714	415
10	Peo-3-O-ara	Peonidin-3-O-arabinoside	Peonidin	0.00539	0.00581	0.00575	0.017	0.0147	0.0134	0.0113957	2.6608	1.4119	up			11	Cya-3-O-xyl	Cyanidin-3-O-xyloside	0.00967	0.00974	0.00694	0.127	0.133	0.0972	0.0514	0.0674	0.0472	0.0553	0.0088	0.1191
11	Peo-3-O-(6-O-malonyl)-glu	Peonidin-3-O-(6-O-malonyl-beta-D-glucoside)	Peonidin	0.156	0.096	0.0889	165	171	165	0.000143361	1469.64	10.5212	up			12	Del-3-O-(6-O-malonyl)-glu-glu	Delphinidin-3-O-(6-O-malonyl)-glucoside-3'-glucoside	0.41	0.187	0.203	0.65	0.938	0.665	0.989	0.801	0.452	0.7473	0.2667	0.751
12	Fla_dihydromyricetin	Dihydromyricetin	flavonoid	5.87	1.84	1.37	0.514	0.391	0.525	0.216002	0.1575	-2.6666	down			13	Del-3-O-gal	Delphinidin-3-O-galactoside	0.0932	0.0832	0.0839	0.0632	0.0897	0.0746	0.0937	0.0779	0.0639	0.0785	0.0868	0.0758
13	Fla_quercetin-glu	Quercetin-3-O-glucoside	flavonoid	83.2	16.3	18.7	136	82.9	63.5	0.150374	2.3892	1.2565	up			14	Del-3-O-sop	Delphinidin-3-O-sophoroside	0.136	0.081	0.0952	0.084	0.151	0.103	0.132	0.108	0.0804	0.1068	0.1041	0.1127
14	Fla_rutin	Rutin	flavonoid	57.3	13.2	9.26	95.7	77.1	58.8	0.061167	2.9037	1.5379	up			15	Del-3-rut-5-glu	Delphinidin-3-rutinoside-5-glucoside	0.0581	0.0519	0.0517	0.0652	0.0721	0.0635	0.0697	0.0688	0.0594	0.066	0.0539	0.0669
15	Fla_kaempferol-3-O-rut	Kaempferol-3-O-rutinoside	flavonoid	8.7	3.47	2.19	12.6	11.7	7.83	0.0803385	2.2375	1.1619	up			16	Fla_kaempferol-3-O-rut	Kaempferol-3-O-rutinoside	8.7	3.47	2.19	12.5	13.2	9.16	12.6	11.7	7.83	10.71	4.7867	11.62
16	Del-3-O-(6-O-malonyl)-glu-glu	Delphinidin-3-O-(6-O-malonyl)-glucoside-3'-glucoside	Delphinidin	0.41	0.187	0.203	0.989	0.801	0.452	0.0746782	2.8025	1.4867	up			17	Fla_naringenin-7-O-glu	Naringenin-7-O-glucoside	0.279	0.261	0.338	0.815	0.81	0.905	0.737	0.589	0.309	0.545	0.2927	0.8433
																18	Fla_rutin	Rutin	57.3	13.2	9.26	96.1	115	85.9	95.7	77.1	58.8	77.2	26.5867	99
	L (Green leaves) vs. Z (Purple leaves)															19	Pel-3-O-(6-O-malonyl)-glu	Pelargonidin-3-O-(6-O-malonyl-beta-D-glucoside)	0.0533	0.0515	0.0517	6.42	5.96	4.26	3.95	4.62	4.23	4.2667	0.0522	5.5467
	Index	Compounds	Class	L-1	L-2	L-3	H-1	H-2	H-3	Pvalue	Fold_Change	Log2FC	Type			20	Peo-3-O-(6-O-malonyl)-glu	Peonidin-3-O-(6-O-malonyl-beta-D-glucoside)	0.156	0.096	0.0889	226	232	206	165	171	165	167	0.1136	221.333
1	Del-3-O-glu	Delphinidin-3-O-glucoside	Delphinidin	0.587	0.143	0.196	0.543	0.94	0.612	0.105481	2.2624	1.1779	up			21	Peo-3-O-ara	Peonidin-3-O-arabinoside	0.00539	0.00581	0.00575	0.0175	0.02	0.0128	0.017	0.0147	0.0134	0.015	0.0056	0.0168
2	Cya-3-O-sop	Cyanidin-3-O-sophoroside	Cyanidin	0.0147	0.00507	0.00612	0.025	0.0307	0.0185	0.0267935	2.866	1.519	up			22	Pet-3-O-(coumaryl)-glu	Petunidin-3-O-(coumaryl)-glucoside	5.41	2.77	2.27	6.12	5.35	4.71	7.07	5.39	5.41	5.9567	3.4833	5.3933
3	Cya-3-O-glu	Cyanidin-3-O-glucoside	Cyanidin	0.0406	0.00477	0.00304	58.3	62	45.1	0.00854866	3416.65	11.7384	up			23	Procyanidin B3	Procyanidin B3	0.34	0.283	0.235	0.664	0.537	0.517	0.498	0.518	0.496	0.504	0.286	0.5727
4	Cya-3-O-(6-O-malonyl)-glu	Cyanidin-3-O-(6-O-malonyl-beta-D-glucoside)	Cyanidin	0.144	0.0343	0.036	446	447	352	0.00571442	5809.61	12.5042	up			24	Cya-3,5-O-diglu	Cyanidin-3,5-O-diglucoside	N/A	N/A	N/A	0.0866	0.164	0.0722	0.0639	0.0621	0.0476	0.0579	N/A	0.1076
5	Cya-3-O-xyl	Cyanidin-3-O-xyloside	Cyanidin	0.00967	0.00974	0.00694	0.127	0.133	0.0972	0.00954504	13.556	3.7609	up			25	Pel-3-O-glu	Pelargonidin-3-O-glucoside	N/A	N/A	N/A	0.349	0.358	0.245	0.187	0.236	0.201	0.208	N/A	0.3173
6	Pet-3-O-gal	Petunidin-3-O-galactoside	Petunidin	0.896	0.443	0.451	0.0987	0.111	0.0901	0.0798131	0.1675	-2.5778	down			26	Pel-3-O-sop	Pelargonidin-3-O-sophoroside	0.108	0.0702	0.0756	0.0656	0.0796	0.0612	N/A	N/A	N/A	N/A	0.0846	0.0688
7	Pet-3-O-glu	Petunidin-3-O-glucoside	Petunidin	3.7	1.21	1.33	0.46	0.679	0.378	0.19031	0.2431	-2.0404	down			27	Peo-3,5-O-diglu	Peonidin-3,5-O-diglucoside	N/A	N/A	N/A	0.136	0.173	0.112	0.169	0.139	0.125	0.1443	N/A	0.1403
8	Pel-3-O-(6-O-malonyl)-glu	Pelargonidin-3-O-(6-O-malonyl-beta-D-glucoside)	Pelargonidin	0.0533	0.0515	0.0517	6.42	5.96	4.26	0.013994	106.326	6.7323	up			28	Pet-3-O-gal	Petunidin-3-O-galactoside	0.896	0.443	0.451	0.0987	0.111	0.0901	0.111	0.101	0.101	0.1043	0.5967	0.0999
9	Peo-3-O-gal	Peonidin-3-O-galactoside	Peonidin	0.201	0.133	0.166	0.664	0.887	0.598	0.0201898	4.298	2.1037	up			29	Cya-3-O-rut	Cyanidin-3-O-rutinoside	N/A	N/A	N/A	5.73	7.23	4.47	3.38	4.32	3.13	3.61	N/A	5.81
10	Peo-3-O-ara	Peonidin-3-O-arabinoside	Peonidin	0.00539	0.00581	0.00575	0.0175	0.02	0.0128	0.0337741	2.9676	1.5693	up			30	Mal-3-O-(6-O-malonyl)-glu	Malvidin-3-O-(6-O-malonyl-beta-D-glucoside)	N/A	N/A	N/A	0.0599	0.0641	0.0624	0.0631	0.0587	0.058	0.0599	N/A	0.0621
11	Peo-3-O-(6-O-malonyl)-glu	Peonidin-3-O-(6-O-malonyl-beta-D-glucoside)	Peonidin	0.156	0.096	0.0889	226	232	206	0.00125989	1947.79	10.9276	up			31	Peo-3-O-glu	Peonidin-3-O-glucoside	N/A	N/A	N/A	14.6	15.9	11.7	12.2	12.5	12.2	12.3	N/A	14.0667
12	Fla_dihydromyricetin	Dihydromyricetin	flavonoid	5.87	1.84	1.37	0.252	0.297	0.226	0.192121	0.0854	-3.5496	down			32	Peo-3-O-rut	Peonidin-3-O-rutinoside	N/A	N/A	N/A	6.94	8.77	5.98	3.57	5.39	3.74	4.2333	N/A	7.23
13	Fla_quercetin-glu	Quercetin-3-O-glucoside	flavonoid	83.2	16.3	18.7	89.4	104	69.1	0.146236	2.2208	1.1511	up			33	Pet-3-O-ara	Petunidin-3-O-arabinoside	N/A	N/A	N/A	0.0999	0.107	0.0885	0.0832	0.0857	0.071	0.08	N/A	0.0985
14	Fla_rutin	Rutin	flavonoid	57.3	13.2	9.26	96.1	115	85.9	0.024104	3.7237	1.8967	up			34	Cya-3-O-rut-5-O-glu	Cyanidin-3-rutinoside-5-glucoside	N/A	N/A	N/A	0.0561	0.0586	0.0564	0.052	0.0533	0.0511	0.0521	N/A	0.057
15	Fla_kaempferol-3-O-rut	Kaempferol-3-O-rutinoside	flavonoid	8.7	3.47	2.19	12.5	13.2	9.16	0.0540882	2.4276	1.2795	up			35	Del-3-O-(6-O-malonyl)-glu	Delphinidin-3-O-(6-O-malonyl-beta-D-glucoside)	N/A	N/A	N/A	1.34	N/A	N/A	1.53	1.23	0.637	1.1323	N/A	1.34
16	Fla_naringenin-7-O-glu	Naringenin-7-O-glucoside	flavonoid	0.279	0.261	0.338	0.815	0.81	0.905	0.000222269	2.8815	1.5268	up			36	Mal-3-O-gal	Malvidin-3-O-galactoside	0.0111	0.0079	0.00911	N/A	N/A	N/A	N/A	N/A	N/A	N/A	0.0094	N/A
17	Procyanidin B3	Procyanidin B3	Procyanidin	0.34	0.283	0.235	0.664	0.537	0.517	0.00959163	2.0023	1.0017	up			37	Cya-3-O-gal	Cyanidin-3-O-galactoside	0.0496	0.0108	0.00839	N/A	N/A	N/A	N/A	N/A	N/A	N/A	0.0229	N/A
18	Del-3-O-(6-O-malonyl)-glu-glu	Delphinidin-3-O-(6-O-malonyl)-glucoside-3'-glucoside	Delphinidin	0.41	0.187	0.203	0.65	0.938	0.665	0.0168688	2.8163	1.4938	up			38	Fla_naringenin	Naringenin	0.0101	0.00585	0.00666	N/A	N/A	N/A	N/A	N/A	N/A	N/A	0.0075	N/A
																39	Pel-3-O-rut	Pelargonidin-3-O-rutinoside	N/A	N/A	N/A	0.0553	0.0552	0.0546	0.0546	0.0549	N/A	0.0548	N/A	0.055
	Z (Purple leaves) vs. H (Yellow leaves)															40	Pel-3-O-gal	Pelargonidin-3-O-galactoside	0.281	0.146	0.179	N/A	N/A	N/A	N/A	N/A	N/A	N/A	0.202	N/A
	Index	Compounds	Class	L-1	L-2	L-3	H-1	H-2	H-3	Pvalue	Fold_Change	Log2FC	Type
1	Cya-3-O-xyl	Cyanidin-3-O-xyloside	Cyanidin	0.127	0.133	0.0972	0.0514	0.0674	0.0472	0.0136649	0.4647	-1.1056	down
2	Pet-3-O-(6-O-malonyl)-glu	Petunidin-3-O-(6-O-malonyl-beta-D-glucoside)	Petunidin	0.959	0.329	0.243	1.64	1.13	0.767	0.120912	2.3103	1.2081	up
